# Supplementary material
Source: publisher figshare collection journal article supplement (https://tandf.figshare.com/ndownloader/files/22123611)
Supplement: Supplementary file 1 [file 22123611]

| ID | Age | occupation | Current contraceptive method | parity | morbidity of interesta | Relationship status | Interview Duration (minutes) |
| --- | --- | --- | --- | --- | --- | --- | --- |
| w1 | 30 | PhD student | Noneb | 1 | - | Cohabiting | 35 |
| W2 | 27 | Psychologist | Condom | 1 | Dysmenorrhea, Vaginismus  PMSc | Cohabiting | 46 |
| W3 | 33 | Journalist | POPd | 2 | - | Married | 55 |
| W4 | 30 | Veterinary | Condom | 0 | - | Divorced, short term relations | 32 |
| W5 | 27 | Medical doctor | Condom | 0 | - | Cohabiting | 53 |
| W6 | 30 | Self-employed  Cultural studies | POPd | 0 | Endometriosis | Cohabiting | 74 |
| W7 | 33 | University student | Lng-IUSe | 0 | Hypothyroidism ADHD  PMSc  Depression | Single | 81 |
| W8 | 30 | Assistant nurse | Condom | 0 | Irregular bleeding | Cohabiting | 65 |
| W9 | 33 |  | Implant | 2 | - | Cohabiting | 58 |
| W10 | 30 | Employed IT company | Noneb | 1 | - | Married | 61 |
| W11 | 27 | Employed IT company | Condom | 0 | - | Short term relations | 73 |
| W12 | 30 | Assistant nurse | Cu IUDf | 1 | Dysmenorrhea  Microinvasive cervical cancer | Married | 55 |
| W13 | 33 | Teacher | Nursing | 3 | - | Married | 46 |
| W14 | 33 | Secretary | Cu IUDf | 1 | - | Cohabiting | 102 |
| W15 | 33 | IT developer | Noneb | 1 | - | Married | 64 |
| W16 | 33 | Assistant nurse | Injection | 2 | PMSc | Divorced, single | 44 |
| W17 | 30 | PhD student | Natural methodg | 0 | Irregular bleeding | Married | 64 |
| W18 | 33 | (cognition science) Sick leave | Cu IUD | 0 | depression | Cohabiting | 58 |
| W19 | 27 | Unknownh | Natural methodg | 0 | Recurring ovarian cysti | Cohabiting | 96 |
| W20 | 30 | Biomedical analyst | Nursing | 3 | - | Cohabiting | 59 |
| W21 | 33 | Nurse | Condom | 2 | PMDSj | Married | 69 |
| W22 | 30 | Speech therapist | Lng-IUSe | 1 | PMSc | Married | 70 |
| W23 | 30 | Curator | Condom | 1 | Multipple sclerosis (MS) | Married | 69 |
| W24 | 33 | Military commander | POPd | 0 | - | Boyfriend | 59 |

Supplement 1. Additional information of the women included, named as W1-W24. Current contraceptive method is defined as the main method used at the time of the interview.

a self-reported morbidity that was considered of interest for the study

b ongoing or planning pregnancy

c premenstrual symptoms

d progestin only pill

e Levonorgestrel intrauterine system

f Copper intrauterine device

g Using calendar apps, Billing’s method or non-penetrative sex

h Not mentioned during the interview

i spontaneously resolving ovarian cysts with recurrent low abdominal pain

j premenstrual dysphoric syndrome
